# Supplementary material
Source: publisher site journal article supplement (https://www.dovepress.com/article/394749)
Supplement: Supplementary file 1 [file get_supplementary_file.php]

**Supplementary Table 1** Demographic data of controls and MCI subjects not under melatonin treatment

|  | Controls no-MEL | | MCI no-MEL | | Statistics | |
| --- | --- | --- | --- | --- | --- | --- |
| (n = 10) | | (n = 9) | | FET | T-test |
| Age (yrs: mean, SEM) | 71 | 3 | 75 | 2 | - | .255 |
| Female (n, %) | 8 | 80 | 4 | 44 | .170 | - |
| Higher education (n, %) | 6 | 60 | 8 | 89 | .303 | - |
| RAVLT TL (mean, SEM) | 42 | 2 | 30 | 3 | - | **.007 b** |
| RAVLT D (mean, SEM) | 10 | 1 | 4 | 1 | - | **<.001 b** |
| RAVLT R (mean, SEM) | 15 | 0 | 11 | 1 | - | **.004 b** |
| SF (mean, SEM) | 20 | 1 | 14 | 2 | - | **.050 a** |
| PF (mean, SEM) | 16 | 1 | 12 | 2 | - | **.049 a** |
| TMT A (sec: mean, SEM) | 50 | 5 | 58 | 12 | - | .558 |
| TMT B (sec: mean, SEM) | 113 | 12 | 176 | 21 | - | **.022 a** |

**Notes:** a Statistical significance at p < 0.05; b statistical significance at p < 0.01. Comparisons surviving FDR correction at q=0.2 are marked in **bold**.

**Abbreviations:** MCI, mild cognitive impairment; FET, Fisher’s exact test; MEL, melatonin; RAVLT TL, Rey Auditory Verbal Learning Test - Total Learning; RAVLT D, Rey Auditory Verbal Learning Test – Delayed recall; RAVLT, Rey Auditory Verbal Learning Test – Recognition; SF, Semantic Fluency; PF, Phonemic Fluency; TMT A, Trail Making Test – part A; TMT B, Trail Making Test – part B.

**Supplementary Table 2** Demographic data of MCI patients under melatonin treatment

|  | No-MEL | | MEL | | Statistics | |
| --- | --- | --- | --- | --- | --- | --- |
| (n = 9) | | (n = 13) | | FET | T-test |
| Age (yrs: mean, SEM) | 75 | 2 | 77 | 2 | - | .660 |
| Female (n, %) | 4 | 44 | 6 | 46 | 1.000 | - |
| Higher education (n, %) | 8 | 89 | 2 | 15 | **.002 a** | - |
| RAVLT TL (mean, SEM) | 30 | 3 | 26.6 | 3.8 | - | .496 |
| RAVLT D (mean, SEM) | 3.7 | .8 | 2.8 | .9 | - | .431 |
| RAVLT R (mean, SEM) | 10.5 | 1 | 9.9 | 1.8 | - | .762 |
| SF (mean, SEM) | 14.4 | 2.1 | 11.3 | 1.5 | - | .256 |
| PF (mean, SEM) | 11.5 | 1.6 | 9.1 | 1.9 | - | .354 |
| TMT A (sec: mean, SEM) | 57.9 | 11.7 | 111.5 | 35.2 | - | .198 |
| TMT B (sec: mean, SEM) | 176.1 | 20.9 | 160.3 | 50.2 | - | .785 |

**Notes:** a Statistical significance at p < 0.05. Comparisons surviving FDR correction at q=0.2 are marked in **bold**.

**Abbreviations:** MCI, mild cognitive impairment; FET, Fisher’s exact test; MEL, melatonin; MMSE, Mini Mental State Examination; RAVLT TL, Rey Auditory Verbal Learning Test - Total Learning; RAVLT D, Rey Auditory Verbal Learning Test – Delayed recall; RAVLT, Rey Auditory Verbal Learning Test – Recognition; SF, Semantic Fluency; PF, Phonemic Fluency; TMT A, Trail Making Test – part A; TMT B, Trail Making Test – part B.

**Supplementary Table 3** Actigraphy analysis of controls and MCI subjects not under melatonin treatment

|  | Controls no-MEL  (n = 8) | | MCI no-MEL  (n = 7) | | Statistics |
| --- | --- | --- | --- | --- | --- |
| Mean | SEM | Mean | SEM | T-test |
| Sleep length (nights) | 6 | .3 | 6 .0 | .5 | 1.000 |
| Sleep onset (hh:mm) | 00:14 | 00:28 | 23:50 | 00:14 | .534 |
| Sleep offset (hh:mm) | 08:09 | 00:28 | 08:09 | 00:28 | .993 |
| Sleep duration (m) | 491 | 20 | 501 | 28 | .757 |
| Sleep efficiency (%) | 94 | 3 | 90 | 2 | .235 |
| WASO (m) | 29 | 11 | 50 | 9 | .153 |

**Abbreviations:** MCI, mild cognitive impairment; MEL, melatonin; WASO, wake after sleep onset.

**Supplementary Table 4** Actigraphy analysis in MCI patients under melatonin treatment

|  | No-MEL  (n = 7) | | MEL  (n = 12) | | Statistics |
| --- | --- | --- | --- | --- | --- |
| Mean | SEM | Mean | SEM | T-test |
| Sleep length (nights) | 6.0 | .5 | 6 .7 | .4 | .340 |
| Sleep onset (hh:mm) | 23:50 | 00:14 | 23:42 | 00:14 | .685 |
| Sleep offset (hh:mm) | 08:09 | 00:28 | 08:23 | 00:14 | .488 |
| Sleep duration (m) | 501 | 28 | 532 | 15 | .314 |
| Sleep efficiency (%) | 90 | 2 | 87 | 2 | .368 |
| WASO (m) | 51 | 9 | 71 | 11 | .226 |

**Abbreviations:** MEL, melatonin; WASO, wake after sleep onset.

**Supplementary Table 5** HRV analysis of controls and MCI subjects not under melatonin treatment

|  | Controls no-MEL  (n = 10) | | MCI no-MEL  (n = 6) | | Statistics |
| --- | --- | --- | --- | --- | --- |
| Mean | SEM | Mean | SEM | T-test |
| *Wake* |  |  |  |  |  |
| RRm (ms) | 809 | 41 | 795 | 33 | .814 |
| SDNN (ms) | 61 | 7 | 43 | 5 | .100 |
| RMSSD (ms) | 31 | 4 | 30 | 10 | .948 |
| TA (wpc) | 17.9 | .1 | 17.8 | .1 | .753 |
| VLF (wpc) | 14.9 | .1 | 14.9 | .1 | .824 |
| LF (wpc) | 10.1 | .2 | 10.0 | .2 | .706 |
| HF (wpc) | 7.8 | .2 | 7.6 | .4 | .670 |
| HF (nu) | 9.2 | .7 | 9.6 | 3.0 | .866 |
| L/H | 11.5 | .76 | 13.25 | 2.13 | .361 |
| *Sleep* |  |  |  |  |  |
| RRm (ms) | 922 | 44 | 894 | 44 | .681 |
| SDNN (ms) | 54 | 6 | 39 | 6 | .124 |
| RMSSD (ms) | 34 | 5 | 23 | 9 | .281 |
| TA (wpc) | 18.2 | .1 | 18.1 | .1 | .641 |
| VLF (wpc) | 15.2 | .1 | 15.1 | .1 | .524 |
| LF (wpc) | 10.3 | .2 | 9.9 | .1 | .158 |
| HF (wpc) | 7.9 | .2 | 7.5 | .4 | .237 |
| HF (nu) | 9.6 | .8 | 9.9 | 3.6 | .921 |
| L/H | 11.7 | 1.3 | 13.7 | 2.4 | .432 |
| *Sleep - Wake* |  |  |  |  |  |
| RRm (ms) | 132 | 27 | 99 | 16 | .400 |
| SDNN (ms) | -2 | 4 | -4 | 3 | .703 |
| RMSSD (ms) | 4 | 4 | -7 | 1 | **.044 a** |
| TA (wpc) | .3 | .1 | .3 | .1 | .442 |
| VLF (wpc) | .4 | .1 | .2 | .0 | .140 |
| LF (wpc) | .3 | .1 | -.1 | .1 | **.040 a** |
| HF (wpc) | .3 | .2 | -.1 | .1 | .133 |
| HF (nu) | .3 | .9 | .3 | .009 | .998 |
| L/H | .5 | 1.2 | .5 | 1.6 | .992 |

**Notes:** a Statistical significance at p < 0.05. Comparisons surviving FDR correction at q=0.2 are marked in **bold**.

**Abbreviations:** MCI, mild cognitive impairment; MEL, melatonin; RRm, mean of RR interval duration; SDNN, standard deviation of RR intervals; RMSSD, square root of the mean squared differences of successive normal RR; TA, total area power; VLF, very low frequency power; LF, low frequency power; HF, high frequency power; wpc, wavelet power coefficients; nu, normalized units.

**Supplementary Table 6** HRV in MCI patients under melatonin treatment

|  | No-MEL  (n = 6) | | MEL  (n = 10) | | Statistics |
| --- | --- | --- | --- | --- | --- |
| Mean | SEM | Mean | SEM | T-test |
| *Wake* |  |  |  |  |  |
| RRm (ms) | 795 | 33 | 877 | 32 | .115 |
| SDNN (ms) | 43 | 5 | 56 | 4 | .077 |
| RMSSD (ms) | 30 | 10 | 45 | 8 | .243 |
| TA (wpc) | 17.8 | .1 | 18.0 | .1 | .083 |
| VLF (wpc) | 14.9 | .1 | 15.1 | .1 | .117 |
| LF (wpc) | 10.0 | .2 | 10.4 | .2 | .172 |
| HF (wpc) | 7.6 | .4 | 8.2 | .3 | .221 |
| HF (nu) | 9.6 | 3.0 | 10.9 | 1.7 | .700 |
| L/H | 13.3 | 2.1 | 11.2 | 1.5 | .436 |
| *Sleep* |  |  |  |  |  |
| RRm (ms) | 894 | 44 | 1109 | 63 | **.025 a** |
| SDNN (ms) | 39 | 6 | 71 | 7 | **.006 b** |
| RMSSD (ms) | 23 | 9 | 51 | 11 | .090 |
| TA (wpc) | 18.1 | .1 | 18.5 | .1 | **.013 a** |
| VLF (wpc) | 15.1 | .1 | 15.5 | .1 | **.010 a** |
| LF (wpc) | 9.9 | .1 | 10.8 | .2 | **.005 b** |
| HF (wpc) | 7.5 | .4 | 8.4 | .3 | .064 |
| HF (nu) | 9.9 | 3.6 | 9.7 | 1.2 | .958 |
| L/H | 13.7 | 2.4 | 11.3 | 1. 5 | .381 |
| *Sleep - Wake* |  |  |  |  |  |
| RRm (ms) | 99 | 16 | 244 | 43 | **.020 a** |
| SDNN (ms) | -4 | 3 | 17 | 6 | **.027 a** |
| RMSSD (ms) | -7 | 1 | 8 | 9 | .182 |
| TA (wpc) | .3 | .1 | .5 | .1 | **.024 a** |
| VLF (wpc) | .2 | .0 | .5 | .1 | **.004 b** |
| LF (wpc) | -.1 | .1 | .5 | .1 | **.001 b** |
| HF (wpc) | -.1 | .1 | .4 | .2 | .054 |
| HF (nu) | .3 | .9 | -1.6 | 1.3 | .321 |
| L/H | .5 | 1.6 | .6 | .9 | .934 |

**Notes:** a Statistical significance at p < 0.05; b statistical significance at p < 0.01. Comparisons surviving FDR correction at q=0.2 are marked in **bold**.

**Abbreviations:** MCI, mild cognitive impairment; MEL, melatonin; RRm, mean of RR interval duration; SDNN, standard deviation of RR intervals; RMSSD, square root of the mean squared differences of successive normal RR; TA, total area power; VLF, very low frequency power; LF, low frequency power; HF, high frequency power; wpc, wavelet power coefficients; nu, normalized units.
